# Supplementary material for: Identifying the common genetic networks of ADR (adverse drug reaction) clusters and developing an ADR classification model
Source: Royal Society of Chemistry journal article supplement (doi:10.1039/c7mb00059f), 2017-06-19
Supplement: c7mb00059f1.pdf [file c7mb00059f1.pdf]

**Supplementary table 1** Description of ADRs, ICD-10 code and ADR genes per each cluster

\* Serotonin syndrome is not classified by ICD-10 code.

| Cluster   | ADRs                     | ICD-10  | ADR Genes                         |
|-----------|--------------------------|---------|-----------------------------------|
| Cluster 0 | Alopecia                 | L65.9   | VDR                               |
|           | Colitis                  | A09     | PTGS2                             |
|           | Diabetes mellitus        | E10-E14 | INSR                              |
|           | Dyspepsia                | R10.1   | PTGS2                             |
|           | Gastric ulcer            | K25     | PTGS2                             |
|           | Myopathy                 | G72.9   | GAA, RYR1                         |
|           | Obesity                  | E66     | PPARG                             |
|           | Osteoporosis             | M81.9   | CYP18A1, ESR1, VDR                |
|           | Photosensitivity         | L56.8   | FECH                              |
| Cluster 1 | Respiratory failure      | J96.9   | GAA                               |
|           | Ataxia                   | R27.0   | CACNA1A                           |
|           | Dysarthria               | R47.1   | CACNA1A                           |
|           | Hemiplegia               | G81     | CACNA1A                           |
|           | Migraine                 | G43     | ATP1A2, CACNA1A                   |
|           | Nystagmus                | H55     | CACNA1A                           |
| Cluster 2 | Vertigo                  | R42     | CACNA1A                           |
|           | Albuminuria              | R80     | AGT                               |
|           | Bradycardia              | I49.5   | AGT                               |
|           | Hypertension             | I10     | AGT                               |
|           | Hypotension              | I95     | ACR, AGT                          |
|           | Renal failure            | N17-N19 | AGT                               |
| Cluster 3 | Tachycardia              | I47.1   | AGT                               |
|           | Anosmia                  | R43.0   | FGFR1                             |
|           | Asthma                   | J45     | CYSLTR2                           |
|           | Breast pain              | N64.4   | PRL                               |
|           | Deep vein thrombosis     | I80.2   | MTHFR                             |
|           | Epilepsy                 | G40     | CHRNA4, KCNQ2, KCNQ3, SCN1A       |
|           | Hirsutism                | L68.0   | PRL                               |
|           | Irritable bowel syndrome | K58     | SLC6A4                            |
|           | Paralysis                | G72.3   | KCNJ2                             |
|           | Proteinuria              | R80     | LRP2                              |
|           | Tardive dyskinesia       | G24.0   | DRD3                              |
|           | Thrombocytopenia         | D69.6   | ITGA2B, ITGB3                     |
|           | Tremor                   | R25.1   | HTR2A                             |
|           | Uveitis                  | A18.5   | RBP3                              |
|           | Vasculitis               | D69.0   | MPO                               |
| Cluster 4 | Viral infection          | B34     | TLR7                              |
|           | Angioedema               | T78.3   | ACE                               |
|           | Anxiety                  | F41.9   | HTR1A, HTR2A, HTR2C, SLC6A4       |
|           | Coronary artery disease  | I25.1   | LPL                               |
|           | Cough                    | R05     | ACE                               |
|           | Flushing                 | R23.2   | CYP19A1, PDE5A                    |
|           | Hypothermia              | T68     | HTR1A                             |
|           | Pancreatitis             | K85.3   | LPL                               |
|           | Serotonin syndrome       | *X      | HTR1A                             |
| Cluster 5 | Anorexia                 | R63.0   | TNF                               |
|           | Joint welling            | M25.4   | TNF                               |
|           | Psoriasis                | L40     | TNF                               |
|           | Pulmonary fibrosis       | J84.1   | TNF                               |
|           | Rash                     | L27.0   | EGFR                              |
| Cluster 6 | Atrial fibrillation      | I48.9   | KCNA5, KCNQ1                      |
|           | Syncope                  | R55     | KCNE1, KCNE2, KCNH2, KCNQ1, SCN5A |

|                          |       |                           |
|--------------------------|-------|---------------------------|
| Ventricular fibrillation | I49.0 | KCNQ1, SCN5A              |
| Ventricular tachycardia  | I47.2 | KCNH2, KCNQ1, RYR2, SCN5A |
